# Supplementary material
Source: ML conference proceedings conference paper supplement (https://proceedings.mlr.press/v37/germain15.html)
Supplement: Supplementary file 1 [file germain15-supp.pdf]

---

# MADE: Masked Autoencoder for Distribution Estimation.

## Supplementary Material

---

**Mathieu Germain**

Université de Sherbrooke, Canada

MATHIEU.GERMAIN2@USHERBROOKE.CA

**Karol Gregor**

Google DeepMind

KAROL.GREGOR@GMAIL.COM

**Iain Murray**

University of Edinburgh, United Kingdom

I.MURRAY@ED.AC.UK

**Hugo Larochelle**

Université de Sherbrooke, Canada

HUGO.LAROCHELLE@USHERBROOKE.CA

Table 1. Negative log-likelihood and 95% confidence intervals for Table 4 in the main document.

| Dataset     | MADE              |                   | EoNADE            |
|-------------|-------------------|-------------------|-------------------|
|             | Fixed mask        | Mask sampling     | 16 ord.           |
| Adult       | 13.12 $\pm$ 0.05  | 13.13 $\pm$ 0.05  | 13.19 $\pm$ 0.04  |
| Connect4    | 11.90 $\pm$ 0.01  | 11.90 $\pm$ 0.01  | 12.58 $\pm$ 0.01  |
| DNA         | 83.63 $\pm$ 0.52  | 79.66 $\pm$ 0.63  | 82.31 $\pm$ 0.46  |
| Mushrooms   | 9.68 $\pm$ 0.04   | 9.69 $\pm$ 0.03   | 9.69 $\pm$ 0.03   |
| NIPS-0-12   | 280.25 $\pm$ 1.05 | 275.92 $\pm$ 1.01 | 272.39 $\pm$ 1.08 |
| Ocr-letters | 28.34 $\pm$ 0.22  | 30.04 $\pm$ 0.22  | 27.32 $\pm$ 0.19  |
| RCV1        | 47.10 $\pm$ 0.11  | 46.74 $\pm$ 0.11  | 46.12 $\pm$ 0.11  |
| Web         | 28.53 $\pm$ 0.20  | 28.25 $\pm$ 0.20  | 27.87 $\pm$ 0.20  |

Table 2. Binarized MNIST negative log-likelihood and 95% confidence intervals for Table 6 in the main document.

| Model               |                  |
|---------------------|------------------|
| MADE 1hl (1 mask)   | 88.40 $\pm$ 0.45 |
| MADE 2hl (1 mask)   | 89.59 $\pm$ 0.46 |
| MADE 1hl (32 masks) | 88.04 $\pm$ 0.44 |
| MADE 2hl (32 masks) | 86.64 $\pm$ 0.44 |
